# Supplementary material
Source: ML conference proceedings conference paper supplement (https://openreview.net/forum?id=HvcLKgtbco)
Supplement: supplementary_material [file attachment]

---

# Supplementary Material for “Towards a Comprehensive Benchmark for FPGA Targeted High-Level Synthesis”

---

Anonymous Author(s)

## A Dataset

URL to website/platform where the dataset/benchmark can be viewed and downloaded: <https://zenodo.org/record/8034115>.

The license of our repository is Creative Commons Attribution 4.0 International. Our benchmark is for researchers and scientists to propose innovative methods for HLS. We implement a number of representative methods and compare all of them under the same framework.

We plan to maintain the dataset and code base by creating a GitHub repository upon paper acceptance. The kernels are chosen from the commonly-used benchmarks: MachSuite [2] and PolyBench [3]. We will continuously add new kernels and labeled designs with instructions on how to download and use them in the upcoming GitHub repository. We plan to add all the kernels, along with their varying input sizes, from the aforementioned benchmarks, in addition to expanding to new benchmarks.

## B Reproducibility

To ensure all the results are easily reproducible, we release the complete set of hyperparameters used to train the methods. In the main paper, we have 10 methods in total, where each method is trained on both versions of the dataset (SDX (v1) and VITIS (v2)) as well as both the regress. Therefore, there are  $10 * 2 * 2 = 40$  models in total to be trained. Each one of these 40 experiments has its complete set of hyperparameters released under the folder “configs\_for\_reproducibility”. Specifically, the files under the folder “configs\_for\_reproducibility” are of the following formats: “<method\_name>\_v<1|2>\_<r|c>.txt”. For example, the file “[CODET5,GNN-GSE]\_v1\_c.txt” indicates this file contains all the hyperparameters we used to train the concatenation-based model on SDX (v1) for the classification task. As a result, we encourage referring to these files for complete hyperparameter details, such as learning rate, batch size, number of GNN/transformer layers, etc.

## C Pragma Effects

### Example 1: pragma TILE

Code 1 illustrates the atax kernel from PolyBench [3], which includes two matrix-vector multiplications. The objective of this example is to demonstrate the influence of the TILE pragma. Consequently, only the TILE pragma for the  $i$  loop is modified from its default value to 4 (Line 41), while the remaining pragmas retain their default settings, indicating they are turned off. The TILE pragma can be used to adjust the memory footprint of the loop below it. Specifically, with a TILE factor of 4 in this example, we aim to cache data for 4 iterations of the  $i$  loop. Without this pragma, the Merlin Compiler [1] sets a default caching amount.

---

```

32 #pragma ACCEL kernel
33 void kernel_atax(double A[116][124], double x[124], double y[124], double tmp[116]){
34     int i, j;
35
36     for (i = 0; i < 124; i++)
37         y[i] = ((double) 0);
38
39 #pragma ACCEL PIPELINE off
40 #pragma ACCEL TILE FACTOR=4
41 #pragma ACCEL PARALLEL FACTOR=1
42     for (i = 0; i < 116; i++) {
43         tmp[i] = 0.0;
44
45 #pragma ACCEL PARALLEL reduction=tmp FACTOR=1
46         for (j = 0; j < 124; j++) {
47             tmp[i] += A[i][j] * x[j];
48         }
49
50 #pragma ACCEL PARALLEL reduction=y FACTOR=1
51         for (j = 0; j < 124; j++) {
52             y[j] += A[i][j] * tmp[i];
53         }
54     }
55 }
56 }

```

---

Code 1: Code snippet of the atax kernel with a TILE pragma as input to the Merlin Compiler.

---

```

58 // skipping the definition of helper memcpy modules for brevity
59 __kernel void kernel_atax(merlin_uint_256 A[3596], double x[124], double y[124], double tmp[116]){
60 #pragma HLS INTERFACE m_axi port=A offset=slave depth=3596 bundle=merlin_gmem_kernel_atax_256_0
61 #pragma HLS INTERFACE m_axi port=tmp offset=slave depth=116 bundle=merlin_gmem_kernel_atax_64_tmp
62 #pragma HLS INTERFACE m_axi port=x offset=slave depth=124 bundle=merlin_gmem_kernel_atax_64_0
63 #pragma HLS INTERFACE m_axi port=y offset=slave depth=124 bundle=merlin_gmem_kernel_atax_64_y
64
65 #pragma HLS INTERFACE s_axilite port=A bundle=control
66 #pragma HLS INTERFACE s_axilite port=tmp bundle=control
67 #pragma HLS INTERFACE s_axilite port=x bundle=control
68 #pragma HLS INTERFACE s_axilite port=y bundle=control
69 #pragma HLS INTERFACE s_axilite port=return bundle=control
70
71     double y_buf[124];
72     int i;
73     int j;
74
75     merlinL10: for (i = 0; i < 124; i++) {
76 #pragma HLS dependence variable=y_buf array inter false
77 #pragma HLS pipeline
78         y_buf[i] = ((double) 0);
79     }
80     merlin_memcpy_0(y, 0, y_buf, 0, sizeof(double) * ((unsigned long) 124), 992UL);
81
82     merlinL9: for (i = 0; i < 29; i++) {
83         double y_buf_0[124];
84         double x_buf[124];
85         double A_buf[4][124];
86 #pragma HLS array_partition variable=A_buf cyclic factor=4 dim=2
87         double tmp_buf[4];
88         merlin_memcpy_1(tmp_buf, 0, tmp, i * 4, sizeof(double) * ((unsigned long) 4), 32UL);
89         memcpy_wide_bus_read_double_2d_124_256(A_buf, (size_t) 0, (size_t) 0, (merlin_uint_256 *) A, (size_t)
90             (((long) i) * 496L * ((long) 8)), sizeof(double) * ((unsigned long) 496L), (size_t) 496L);
91         merlin_memcpy_2(x_buf, 0, x, 0, sizeof(double) * ((unsigned long) 124), 992UL);
92         merlin_memcpy_3(y_buf_0, 0, y, 0, sizeof(double) * ((unsigned long) 124), 992UL);
93
94         merlinL8: for (int i_sub = 0; i_sub < 4; ++i_sub) {
95             tmp_buf[i_sub] = 0.0;
96             merlinL7: for (j = 0; j < 124; j++) {
97 #pragma HLS pipeline
98                 tmp_buf[i_sub] += A_buf[i_sub][j] * x_buf[j];
99             }
100             merlinL6: for (j = 0; j < 124; j++) {
101 #pragma HLS dependence variable=y_buf_0 array inter false
102 #pragma HLS pipeline
103                 y_buf_0[j] += A_buf[i_sub][j] * tmp_buf[i_sub];
104             }
105             merlin_memcpy_4(y, 0, y_buf_0, 0, sizeof(double) * ((unsigned long) 124), 992UL);
106             merlin_memcpy_5(tmp, i * 4, tmp_buf, 0, sizeof(double) * ((unsigned long) 4), 32UL);
107         }
108     }

```

---

Code 2: AMD/Xilinx Vitis HLS equivalent of Code 1 automatically generated by the Merlin Compiler.

The Merlin Compiler takes Code 1 as input and applies source-to-source code transformations to generate an equivalent implementation using AMD/Xilinx Vitis HLS. The resulting code is shown in Code 2. To keep it concise, we omit the helper modules (e.g., `memcpy` modules) responsible for transferring data from off-chip (global) memory to on-chip buffers. The HLS code is then processed by the AMD/Xilinx HLS tool, which generates the RTL-equivalent of the design that can be mapped to the target FPGA. We do not display the generated RTL code here as it exceeds 10,000 lines.

The generated HLS code begins with `interface` pragmas, which define the communication protocol between the design and external components. Notably, in the top-level function, the precision of the argument `A` is changed from `double` (64 bits) to 256-bit data. This technique, known as memory coalescing, helps reduce communication latency by combining multiple (in this case, 4) memory accesses into a single transaction. The Merlin Compiler automatically determines the appropriate approach for memory coalescing. Additionally, it analyzes data dependencies within the design, assisting the HLS tool in understanding whether true dependencies exist between iterations of different loops (lines 77 and 102). The Merlin Compiler can also infer other AMD/Xilinx HLS pragmas, such as `as pipeline`, `array_partition`, `unroll`, `inline`, etc.

Since the second  $i$  loop in Code 1 is tiled with a factor of 4, it is transformed into two sub-loops in Code 2, namely lines 83 (merlinL9 loop with trip-count of  $116/4=29$ ) and 95 (merlinL8 loop with trip-count of 4). The merlinL9 loop transfers the necessary data for executing the merlinL8 loop before proceeding with its execution.

## Example 2: pragma PIPELINE and PARALLEL

Code 3 showcases the `mvt` kernel from PolyBench, which, similar to `atax`, involves two matrix-vector multiplications. However, the order of execution and the dependency between them differ. In the first nested loop, we apply a `PIPELINE` pragma with the *flatten* mode, resulting in unrolling the inner loops and pipelining the loop at which the pragma is applied. This technique is known as fine-grained pipelining. To highlight the contrast with coarse-grained pipelining, we employ a different form of pipelining for the second nested loop. Coarse-grained pipelining divides the computation within the loop into multiple modules (e.g., load-compute-store units) connected in a pipeline fashion. Additionally, we apply `PARALLEL` pragmas to the second nested loop. The remaining pragmas, set to their default values, have no impact on the resulting microarchitecture.

---

```

139 #pragma ACCEL kernel
140 void kernel_mvt(double x1[120], double x2[120], double y_1[120], double y_2[120], double A[120][120]) {
141     int i, j;
142
143     #pragma ACCEL PIPELINE flatten
144     #pragma ACCEL TILE FACTOR=1
145     #pragma ACCEL PARALLEL FACTOR=1
146     for (i = 0; i < 120; i++) {
147         #pragma ACCEL PARALLEL reduction = x1 FACTOR=1
148         for (j = 0; j < 120; j++) {
149             x1[i] += A[i][j] * y_1[j];
150         }
151     }
152
153     #pragma ACCEL PIPELINE
154     #pragma ACCEL TILE FACTOR=1
155     #pragma ACCEL PARALLEL FACTOR=2
156     for (i = 0; i < 120; i++) {
157         #pragma ACCEL PARALLEL reduction = x2 FACTOR=2
158         for (j = 0; j < 120; j++) {
159             x2[i] += A[j][i] * y_2[j];
160         }
161     }
162 }
163 }
```

---

Code 3: Code snippet of the `mvt` kernel with `PIPELINE` and `PARALLEL` pragmas as input to the Merlin Compiler.

---

```

165 // skipping the definition of helper modules for brevity
166 void mars_kernel_0_2_node_0_stage_0(int i, int exec, double _x2_buf_rdc_0[2][2]){
167     #pragma HLS INLINE OFF

```

```

169     if (exec == 1) {
170         merlinL6: for (int i_sub_0 = 0; i_sub_0 <= 1; ++i_sub_0) {
171             #pragma HLS unroll
172             merlinL5: for (int j_sub_0 = 0; j_sub_0 <= 1; ++j_sub_0) {
173                 #pragma HLS unroll
174                 _x2_buf_rdc_0[i_sub_0][j_sub_0] = ((double) 0);
175             } } }
176
177 void mars_kernel_0_2_node_1_stage_1(int i,int exec,double A_buf[120][120],double
178 _x2_buf_rdc_0[2][2],double y_2_buf[60][2]) {
179     #pragma HLS INLINE OFF
180     if (exec == 1) {
181         merlinL9: for (int j = 0; j < 60; j++) {
182             #pragma HLS pipeline
183             merlinL8: for (int i_sub = 0; i_sub < 2; ++i_sub) {
184                 #pragma HLS unroll
185                 merlinL7: for (int j_sub = 0; j_sub < 2; ++j_sub) {
186                     #pragma HLS unroll
187                     _x2_buf_rdc_0[i_sub][j_sub] += A_buf[((long)j) * 2L + ((long)j_sub)][((long)i) * 2L + ((long)
188                     i_sub)] * y_2_buf[j][j_sub];
189                 } } } }
190
191 void mars_kernel_0_2_node_2_stage_2(int i,int exec,double _x2_buf_rdc_0[2][2],double x2_buf[60][2]){
192     #pragma HLS INLINE OFF
193     if (exec == 1) {
194         merlinL11: for (int i_sub_1 = 0; i_sub_1 <= 1; ++i_sub_1) {
195             #pragma HLS unroll
196             merlinL10: for (int j_sub_1 = 0; j_sub_1 <= 1; ++j_sub_1) {
197                 #pragma HLS unroll
198                 x2_buf[i][i_sub_1] += _x2_buf_rdc_0[i_sub_1][j_sub_1];
199             } } }
200
201 void mars_kernel_0_2(int mars_i,int mars_init,int mars_cond,double mars_A_buf_1[120][120],double
202 mars__x2_buf_rdc_0_0[2][2],double mars__x2_buf_rdc_0_1[2][2],double
203 mars__x2_buf_rdc_0_2[2][2],double mars_x2_buf_2[60][2],double mars_y_2_buf_1[60][2]) {
204     #pragma HLS INLINE OFF
205     mars_kernel_0_2_node_0_stage_0(mars_i - 0,(int)(mars_i >= mars_init + 0 & mars_i <= mars_cond +
206     0),mars__x2_buf_rdc_0_0);
207     mars_kernel_0_2_node_1_stage_1(mars_i - 1,(int)(mars_i >= mars_init + 1 & mars_i <= mars_cond +
208     1),mars_A_buf_1,mars__x2_buf_rdc_0_1,mars_y_2_buf_1);
209     mars_kernel_0_2_node_2_stage_2(mars_i - 2,(int)(mars_i >= mars_init + 2 & mars_i <= mars_cond +
210     2),mars__x2_buf_rdc_0_2,mars_x2_buf_2);
211 }
212
213 __kernel void kernel_mvt(double x1[120],double x2[120],double y_1[120],double y_2[120],merlin_uint_512
214 A[1800]) {
215     #pragma HLS INTERFACE m_axi port=A offset=slave depth=1800 bundle=merlin_gmem_kernel_mvt_512_0
216     #pragma HLS INTERFACE m_axi port=x1 offset=slave depth=120 bundle=merlin_gmem_kernel_mvt_64_x1
217     #pragma HLS INTERFACE m_axi port=x2 offset=slave depth=120 bundle=merlin_gmem_kernel_mvt_64_x2
218     #pragma HLS INTERFACE m_axi port=y_1 offset=slave depth=120 bundle=merlin_gmem_kernel_mvt_64_0
219     #pragma HLS INTERFACE m_axi port=y_2 offset=slave depth=120 bundle=merlin_gmem_kernel_mvt_64_1
220
221     #pragma HLS INTERFACE s_axilite port=A bundle=control
222     #pragma HLS INTERFACE s_axilite port=x1 bundle=control
223     #pragma HLS INTERFACE s_axilite port=x2 bundle=control
224     #pragma HLS INTERFACE s_axilite port=y_1 bundle=control
225     #pragma HLS INTERFACE s_axilite port=y_2 bundle=control
226     #pragma HLS INTERFACE s_axilite port=return bundle=control
227
228     double y_2_buf[60][2];
229     #pragma HLS array_partition variable=y_2_buf complete dim=2
230     double x2_buf[60][2];
231     double y_1_buf[120];
232     #pragma HLS array_partition variable=y_1_buf complete dim=1
233     double x1_buf[120];
234     double A_buf[120][120];
235     #pragma HLS array_partition variable=A_buf complete dim=2
236
237     memcpy_wide_bus_read_double_2d_120_512(A_buf,0,0,(merlin_uint_512 *)A,(0 * 8),sizeof(double) *
238     ((unsigned long)14400L),14400L);
239     merlin_memcpy_0(x1_buf,0,x1,0,sizeof(double) * ((unsigned long)120),960UL);
240     merlin_memcpy_1(y_1_buf,0,y_1,0,sizeof(double) * ((unsigned long)120),960UL);
241
242     merlinL15: for (int i = 0; i < 120; i++) {
243         #pragma HLS dependence variable=x1_buf array inter false
244         #pragma HLS pipeline
245         merlinL14: for (int j = 0; j < 120; j++) {
246             #pragma HLS unroll
247             x1_buf[i] += A_buf[i][j] * y_1_buf[j];
248         }
249     }

```

```

250
251 merlin_memcpy_2(x1,0,x1_buf,0,sizeof(double) * ((unsigned long)120),960UL);
252 merlin_memcpy_3(x2_buf,0,0,x2,0,sizeof(double) * ((unsigned long)120),960UL);
253 merlin_memcpy_4(y_2_buf,0,0,y_2,0,sizeof(double) * ((unsigned long)120),960UL);
254
255 double _x2_buf_rdc_0[2][2];
256 int mars_count_0_2 = 0;
257 double mars_kernel_0_2__x2_buf_rdc_0_0[2][2];
258 #pragma HLS array_partition variable=mars_kernel_0_2__x2_buf_rdc_0_0 complete dim=2
259 #pragma HLS array_partition variable=mars_kernel_0_2__x2_buf_rdc_0_0 complete dim=1
260 double mars_kernel_0_2__x2_buf_rdc_0_1[2][2];
261 #pragma HLS array_partition variable=mars_kernel_0_2__x2_buf_rdc_0_1 complete dim=2
262 #pragma HLS array_partition variable=mars_kernel_0_2__x2_buf_rdc_0_1 complete dim=1
263 double mars_kernel_0_2__x2_buf_rdc_0_2[2][2];
264 #pragma HLS array_partition variable=mars_kernel_0_2__x2_buf_rdc_0_2 complete dim=2
265 #pragma HLS array_partition variable=mars_kernel_0_2__x2_buf_rdc_0_2 complete dim=1
266
267 merlinL13: for (int i = 0; i < 60 + 2; i++) {
268     if (mars_count_0_2 == 0)
269         mars_kernel_0_2(i,0,59,A_buf,mars_kernel_0_2__x2_buf_rdc_0_0,mars_kernel_0_2__x2_buf_rdc_0_1,
270             mars_kernel_0_2__x2_buf_rdc_0_2,x2_buf,y_2_buf);
271     else if (mars_count_0_2 == 1)
272         mars_kernel_0_2(i,0,59,A_buf,mars_kernel_0_2__x2_buf_rdc_0_2,mars_kernel_0_2__x2_buf_rdc_0_0,
273             mars_kernel_0_2__x2_buf_rdc_0_1,x2_buf,y_2_buf);
274     else
275         mars_kernel_0_2(i,0,59,A_buf,mars_kernel_0_2__x2_buf_rdc_0_1,mars_kernel_0_2__x2_buf_rdc_0_2,
276             mars_kernel_0_2__x2_buf_rdc_0_0,x2_buf,y_2_buf);
277     mars_count_0_2++;
278     if (mars_count_0_2 == 3)
279         mars_count_0_2 = 0;
280 }
281 merlin_memcpy_5(x2,0,x2_buf,0,0,sizeof(double) * ((unsigned long)120),960UL);
282 }

```

Code 4: AMD/Xilinx Vitis HLS equivalent of Code 3 automatically generated by the Merlin Compiler.

Code 4 demonstrates the generated HLS code. The first nested loop is translated to loops merlinL15 and merlinL14 of the top-level function *kernel\_mvt*. Because of the flatten pipelining, merlinL15 is pipelined while merlinL14 is completely unrolled. To satisfy this unrolling, the *y\_1\_buf* and *A\_buf* buffers are partitioned in lines 232 and 235, respectively. It is worth noting that the required data are loaded before these loops and the resulting buffer, *x1\_buf* is stored in off-chip memory after the computation is done.

The second nested loop is translated into the merlinL13 loop. The PARALLEL pragma in Line 156 of Code 3 produces a sub-loop with a trip-count of 60 (+2 because of pipelining) for the merlinL13 loop. The PIPELINE pragma in Line 154 divides the computation into three units, referred to as *mars\_kernel\_0\_2\_node\_X\_stage\_X*, thus establishing coarse-grained pipelining in this context. Note that the inner-most loops of these modules have trip-counts of 2 because of the PARALLEL factor of 2 in lines 156 and 158.

## References

- [1] Jason Cong, Muhuan Huang, Peichen Pan, Yuxin Wang, and Peng Zhang. Source-to-source optimization for hls. pages 137–163, 2016.
- [2] Brandon Reagen, Robert Adolf, Yakun Sophia Shao, Gu-Yeon Wei, and David Brooks. Machsuite: Benchmarks for accelerator design and customized architectures. In *IISWC*, 2014.
- [3] Tomofumi Yuki and Louis-Noël Pouchet. Polybench/c.
